# Supplementary material
Source: PubMed Central journal article supplement (PMC6927498)
Supplement: ehp-127-117004-s001.pdf [file ehp-127-117004-s001.pdf]

**Note to readers with disabilities:** *EHP* strives to ensure that all journal content is accessible to all readers. However, some figures and Supplemental Material published in *EHP* articles may not conform to [508 standards](#) due to the complexity of the information being presented. If you need assistance accessing journal content, please contact [ehp508@niehs.nih.gov](mailto:ehp508@niehs.nih.gov). Our staff will work with you to assess and meet your accessibility needs within 3 working days.

### **Supplemental Material**

#### **Presence of Bisphenol A and Parabens in a Neonatal Intensive Care Unit: An Exploratory Study of Potential Sources of Exposure**

Luz M. Iribarne-Durán, Francisco Artacho-Cordón, Manuela Peña-Caballero, José M. Molina-Molina, Inmaculada Jiménez-Díaz, Fernando Vela-Soria, Laura Serrano, José A. Hurtado, Mariana F. Fernández, Carmen Freire, and Nicolás Olea

#### **Table of Contents**

**Table S1.** Concentrations of BPA and PBs and hormone-like activities released from plastic NICU items under soft extraction conditions.

**Figure S1.** Dose-response curves of E2 and ICI on MCF-7 cells and R1881 and procymidone on PALM cells. MCF-7 cells were incubated for 144 h at 37 °C with E2 (Panel A) or ICI in the presence of 100 pM E2 (Panel B) at the indicated concentrations. The values represent the mean  $\pm$  SD of two independent experiments (in triplicate) and results are expressed as proliferative effect [MCF-7 cell proliferation (-fold over control)]. Data were analyzed for significant differences using one-way ANOVA followed by Dunnett's post-comparison test. \* $p < 0.05$  and \*\* $p < 0.01$  (versus hormone-free control or E2 100 pM). PALM cells treated with R1881 (Panel C) or procymidone in the presence of 0.2 nM R1881 (Panel D) at the indicated concentrations for 40 h at 37 °C. The values represent the mean  $\pm$  SD of two independent experiments (in triplicate) and results are expressed as percentage of maximal R1881 induction. Data were analyzed for significant differences using one-way ANOVA followed by Dunnett's post-comparison test. \* $p < 0.05$  and \*\* $p < 0.01$  (versus R1881 10 or 0.2 nM). ICI: The estrogen receptor antagonist ICI 182780; E2: 17 $\beta$ -estradiol.

Table S1. Concentrations of BPA and PBs and hormone-like activities released from plastic NICU items under soft extraction conditions

| Item | Description                                     | EDC content (ng/g) |        |       |        |       |        |       |        |       |        |      | Hormone-like activity                |                           |
|------|-------------------------------------------------|--------------------|--------|-------|--------|-------|--------|-------|--------|-------|--------|------|--------------------------------------|---------------------------|
|      |                                                 | BPA                |        | MeP   |        | EtP   |        | PrP   |        | BuP   |        | ΣPBs | E-Screen                             | PALM Assay                |
|      |                                                 | Mean               | CV (%) | Mean  | CV (%) | Mean  | CV (%) | Mean  | CV (%) | Mean  | CV (%) |      | (pME <sub>2</sub> eq/g) <sup>a</sup> | (mMProceq/g) <sup>b</sup> |
| 3    | Gastro-duodenal feeding tube                    | <0.1               | -      | <0.03 | -      | <0.03 | -      | <0.03 | -      | <0.03 | -      | -    | n.d.                                 | n.d.                      |
| 4    | Extension tube for feeding syringe              | <0.1               | -      | 0.07  | 10.1   | <0.03 | -      | <0.03 | -      | <0.03 | -      | 0.07 | n.d.                                 | n.d.                      |
| 5    | Feeding sampling straw                          | <0.1               | -      | <0.03 | -      | <0.03 | -      | <0.03 | -      | <0.03 | -      | -    | n.d.                                 | n.d.                      |
| 6    | Small dummy                                     | <0.1               | -      | <0.03 | -      | <0.03 | -      | <0.03 | -      | <0.03 | -      | -    | n.d.                                 | 3*10 <sup>-2</sup>        |
| 7    | Large dummy                                     | 0.1                | 8.2    | <0.03 | -      | <0.03 | -      | <0.03 | -      | <0.03 | -      | -    | n.d.                                 | n.d.                      |
| 9A   | Pulse oximeter adhesive sensor I (hard section) | <0.1               | -      | <0.03 | -      | <0.03 | -      | <0.03 | -      | <0.03 | -      | -    | n.d.                                 | n.d.                      |
| 14   | Sterile gloves                                  | <0.1               | -      | <0.03 | -      | <0.03 | -      | <0.03 | -      | <0.03 | -      | -    | n.d.                                 | n.d.                      |
| 15   | Non-sterile gloves                              | <0.1               | -      | <0.03 | -      | <0.03 | -      | <0.03 | -      | <0.03 | -      | -    | n.d.                                 | n.d.                      |
| 35   | Winged IV catheter (transparent section)        | <0.1               | -      | 0.53  | 5.5    | <0.03 | -      | <0.03 | -      | <0.03 | -      | 0.53 | n.d.                                 | n.d.                      |
| 36   | Winged IV catheter                              | <0.1               | -      | <0.03 | -      | <0.03 | -      | <0.03 | -      | <0.03 | -      | -    | n.d.                                 | n.d.                      |
| 37   | Single lumen umbilical vein catheter            | 0.9                | 7.4    | <0.03 | -      | 0.18  | 8.9    | <0.03 | -      | <0.03 | -      | 0.18 | 18.32                                | n.d.                      |

|    |                                                                     |      |     |       |   |       |     |       |      |       |   |      |      |                    |
|----|---------------------------------------------------------------------|------|-----|-------|---|-------|-----|-------|------|-------|---|------|------|--------------------|
| 38 | Double lumen umbilical vein catheter                                | <0.1 | -   | <0.03 | - | <0.03 | -   | <0.03 | -    | <0.03 | - | -    | n.d. | n.d.               |
| 39 | Extension set for the intravenous infusion system                   | <0.1 | -   | <0.03 | - | <0.03 | -   | <0.03 | -    | <0.03 | - | -    | n.d. | n.d.               |
| 40 | Extension set for the intravenous infusion system (light resistant) | <0.1 | -   | <0.03 | - | <0.03 | -   | <0.03 | -    | <0.03 | - | -    | n.d. | n.d.               |
| 41 | Three-way stopcock                                                  | 4.7  | 9.1 | <0.03 | - | <0.03 | -   | <0.03 | -    | <0.03 | - | -    | 9.32 | 4*10 <sup>-2</sup> |
| 49 | Endotracheal tube                                                   | <0.1 | -   | <0.03 | - | 0.87  | 9.9 | 0.43  | 8.8  | <0.03 | - | 1.30 | 7.28 | n.d.               |
| 50 | Closed suction system                                               | <0.1 | -   | <0.03 | - | <0.03 | -   | <0.03 | -    | <0.03 | - | -    | n.d. | n.d.               |
| 51 | Nasal cannula                                                       | <0.1 | -   | <0.03 | - | 1.48  | 7.9 | 0.95  | 11.2 | <0.03 | - | 2.42 | n.d. | n.d.               |
| 52 | Nasal prong                                                         | <0.1 | -   | <0.03 | - | <0.03 | -   | <0.03 | -    | <0.03 | - | -    | n.d. | n.d.               |

EDC: endocrine disrupting chemical; BPA: bisphenol A; MeP: methyl-paraben; EtP: ethyl-paraben; PrP: propyl-paraben;  $\Sigma$ PBs: total concentrations of parabens; CV: coefficient of variation; n.d.: not detected. Values below the limit of detection were represented with the symbol “<” followed by the limit of detection.

<sup>a</sup>Concentrations equivalent to E<sub>2</sub> per gram; <sup>b</sup>Concentrations equivalent to procymidone per gram.

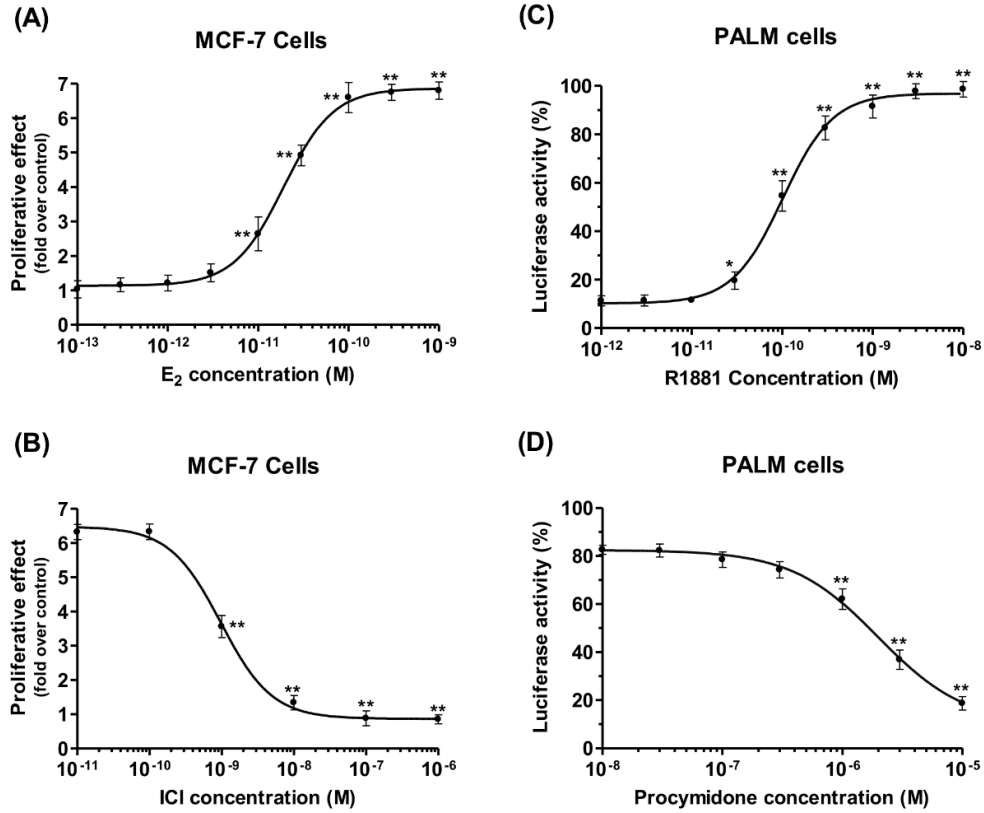

Figure S1. Dose-response curves of E2 and ICI on MCF-7 cells and R1881 and procymidone on PALM cells. MCF-7 cells were incubated for 144 h at 37 °C with E2 (Panel A) or ICI in the presence of 100 pM E2 (Panel B) at the indicated concentrations. The values represent the mean  $\pm$  SD of two independent experiments (in triplicate) and results are expressed as proliferative effect [MCF-7 cell proliferation (-fold over control)]. Data were analyzed for significant differences using one-way ANOVA followed by Dunnett's post-comparison test. \* $p < 0.05$  and \*\* $p < 0.01$  (versus hormone-free control or E2 100 pM). PALM cells treated with R1881 (Panel C) or procymidone in the presence of 0.2 nM R1881 (Panel D) at the indicated concentrations for 40 h at 37 °C. The values represent the mean  $\pm$  SD of two independent experiments (in triplicate) and results are expressed as percentage of maximal R1881 induction. Data were analyzed for significant differences using one-way ANOVA followed by Dunnett's post-comparison test. \* $p < 0.05$  and \*\* $p < 0.01$  (versus R1881 10 or 0.2 nM). ICI: The estrogen receptor antagonist ICI 182780; E2: 17 $\beta$ -estradiol.
