# Supplementary material
Source: PubMed Central journal article supplement (PMC6927498)
Supplement: ehp-127-117004-s002.pdf [file ehp-127-117004-s002.pdf]

**Note to readers with disabilities:** *EHP* strives to ensure that all journal content is accessible to all readers. However, some figures and Supplemental Material published in *EHP* articles may not conform to [508 standards](#) due to the complexity of the information being presented. If you need assistance accessing journal content, please contact [ehp508@niehs.nih.gov](mailto:ehp508@niehs.nih.gov). Our staff will work with you to assess and meet your accessibility needs within 3 working days.

### **Supplemental Material**

#### **Presence of Bisphenol A and Parabens in a Neonatal Intensive Care Unit: An Exploratory Study of Potential Sources of Exposure**

Luz M. Iribarne-Durán, Francisco Artacho-Cordón, Manuela Peña-Caballero, José M. Molina-Molina, Inmaculada Jiménez-Díaz, Fernando Vela-Soria, Laura Serrano, José A. Hurtado, Mariana F. Fernández, Carmen Freire, and Nicolás Olea

#### **Table of Contents**

**Table S1.** Concentrations of BPA and PBs and hormone-like activities released from plastic NICU items under soft extraction conditions.

**Figure S1.** Dose-response curves of E2 and ICI on MCF-7 cells and R1881 and procymidone on PALM cells. MCF-7 cells were incubated for 144 h at 37 °C with E2 (Panel A) or ICI in the presence of 100 pM E2 (Panel B) at the indicated concentrations. The values represent the mean  $\pm$  SD of two independent experiments (in triplicate) and results are expressed as proliferative effect [MCF-7 cell proliferation (-fold over control)]. Data were analyzed for significant differences using one-way ANOVA followed by Dunnett's post-comparison test. \* $p < 0.05$  and \*\* $p < 0.01$  (versus hormone-free control or E2 100 pM). PALM cells treated with R1881 (Panel C) or procymidone in the presence of 0.2 nM R1881 (Panel D) at the indicated concentrations for 40 h at 37 °C. The values represent the mean  $\pm$  SD of two independent experiments (in triplicate) and results are expressed as percentage of maximal R1881 induction. Data were analyzed for significant differences using one-way ANOVA followed by Dunnett's post-comparison test. \* $p < 0.05$  and \*\* $p < 0.01$  (versus R1881 10 or 0.2 nM). ICI: The estrogen receptor antagonist ICI 182780; E2: 17 $\beta$ -estradiol.
